# Supplementary material for: Mismatch Between Birth Date and Vegetation Phenology Slows the Demography of Roe Deer
Source: PLOS journal article supplement (doi:10.1371/journal.pbio.1001828), 2014-04-01
Supplement: S7 (10.1371/journal.pbio.1001828.s007) [file journal.pbio.1001828.s007]

**Table S2: Individual early survival (recruitment function) in the roe deer population of Trois Fontaines, France**

| A.            |     |                    |       |
|---------------|-----|--------------------|-------|
| Model         | $k$ | $\Delta\text{AIC}$ | $w_i$ |
| $MisT$        | 4   | 0.000              | 0.690 |
| $Mis + Mis^2$ | 4   | 1.783              | 0.283 |
| $Mis$         | 3   | 7.682              | 0.015 |
| $PDT$         | 4   | 8.897              | 0.008 |
| $PD + PD^2$   | 4   | 9.739              | 0.005 |
| $PD$          | 3   | 11.556             | 0.002 |
| 1             | 2   | 29.261             | 0.000 |

  

| B.        |          |       |
|-----------|----------|-------|
| Variable  | estimate | SE    |
| intercept | 0.743    | 0.201 |
| MisT      | -0.048   | 0.009 |

A. Effects of maternal parturition date (PD) or the parturition date-vegetation phenology mismatch (Mis) on individual early survival of roe deer. We tested for linear, quadratic and threshold (PDT and MisT) effects of both variables.  $k$  indicates the number of estimated parameters,  $\Delta\text{AIC}$  indicates the difference in the Akaike information criterion between two competing models, and  $w_i$  corresponds to Akaike weights. B. Parameter estimates (on a logit scale) and their associated standard errors (SE) from the best model explaining observed variation in individual early survival.
